# Supplementary material
Source: HighWire-hosted journal article supplement (https://ijgc.bmj.com/content/31/1/52)
Supplement: inline-supplementary-material-1 [file inline-supplementary-material-1.pdf]

Supplementary Table 1. Relapse rate, site of first relapse, and death rate in patients in the NAT, RT, and CCRT groups.

| Parameter              | NAT group, n=85 | RT group, n=283 | CCRT group, n=493 | <i>p</i> -value |              |             |
|------------------------|-----------------|-----------------|-------------------|-----------------|--------------|-------------|
|                        |                 |                 |                   | NAT vs. RT      | NAT vs. CCRT | RT vs. CCRT |
| Relapse                | 10 (11.8%)      | 41 (14.5%)      | 53 (10.8%)        | 0.52            | 0.78         | 0.13        |
| Site of first relapse  |                 |                 |                   |                 |              |             |
| Pelvic                 | 6 (7.1%)        | 15 (5.3%)       | 13 (2.6%)         | 0.09            | 0.04*        | 0.43        |
| Distant                | 2 (2.4%)        | 24 (8.5%)       | 33 (6.7%)         |                 |              |             |
| Combined               | 1 (1.2%)        | 1 (0.4%)        | 3 (0.6%)          |                 |              |             |
| Unknown                | 1 (1.2%)        | 1 (0.4%)        | 4 (0.8%)          |                 |              |             |
| Disease-specific Death | 7 (8.2%)        | 34 (12.0%)      | 42 (8.5%)         | 0.33            | 0.93         | 0.12        |

NAT, no adjuvant treatment; RT, radiotherapy; CCRT, concurrent chemoradiotherapy

Supplementary Table 2. Adjuvant treatment, relapse rate, site of first relapse, and death rate in patients in different subgroups of Sedlis criteria.

| Parameter                    | -LVSI, deep or middle 1/3, ≥4cm<br>(n=461) | +LVSI, deep 1/3<br>(n=193) | +LVSI, middle 1/3, ≥2cm<br>(n=199) | +LVSI, superficial 1/3, ≥5cm<br>(n=8) |
|------------------------------|--------------------------------------------|----------------------------|------------------------------------|---------------------------------------|
| <b>Adjuvant treatment</b>    |                                            |                            |                                    |                                       |
| NAT                          | 55 (11.9%)                                 | 14 (7.3%)                  | 14 (7.0%)                          | 2 (25.0%)                             |
| RT                           | 167 (36.2%)                                | 55 (28.5%)                 | 58 (29.1%)                         | 3 (37.5%)                             |
| CCRT                         | 239 (51.8%)                                | 124 (64.2%)                | 127 (63.8%)                        | 3 (37.5%)                             |
| Relapse                      | 46 (10.0%)                                 | 32 (16.6%)                 | 25 (12.6%)                         | 1 (12.5%)                             |
| <b>Site of first relapse</b> |                                            |                            |                                    |                                       |
| Pelvic                       | 17 (3.7%)                                  | 8 (4.1%)                   | 8 (4.0%)                           | 1 (12.5%)                             |
| Distant                      | 24 (5.2%)                                  | 21 (10.9%)                 | 14 (7.0%)                          | 0                                     |
| Combined                     | 2 (0.4%)                                   | 1 (0.5%)                   | 2 (1.0%)                           | 0                                     |
| Unknown                      | 3 (0.7%)                                   | 2 (1.0%)                   | 1 (0.5%)                           | 0                                     |
| Disease-specific death       | 32 (6.9%)                                  | 28 (14.5%)                 | 22 (11.1%)                         | 1 (12.5%)                             |

LVSI, lymph vascular space invasion; NAT, no adjuvant treatment; RT, adjuvant radiotherapy; CCRT, adjuvant concurrent chemoradiotherapy
